# Supplementary material for: CHCHD2 p.Thr61Ile knock‐in mice exhibit motor defects and neuropathological features of Parkinson's disease
Source: PubMed Central journal article supplement — Brain Pathol. 2022 Nov 2;33(3):e13124. doi: 10.1111/bpa.13124 (PMC10154378; doi:10.1111/bpa.13124), 2022-11-02
Supplement: BPA-33-e13124-s001.pdf [file BPA-33-e13124-s001.pdf]

# Supplementary Figures

**A**

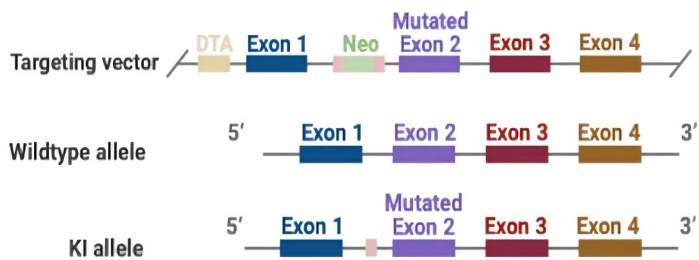

**B**

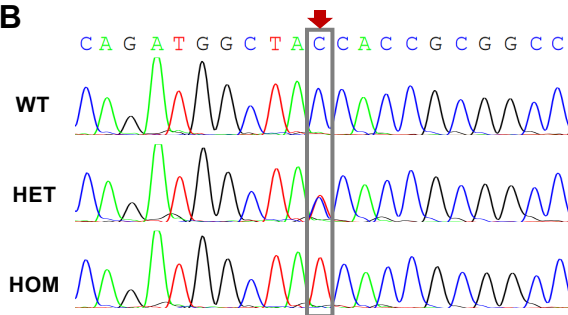

**C**

WT 5' ... CTGATGGCC CAGATGGCTACCACCGCGGCCGGTGTGGCT ...3'

#

T61I 5' ... CTGATGGCC CAGATGGCTATCACCAGCGGCCGGTGTGGCT ...3'

**D**

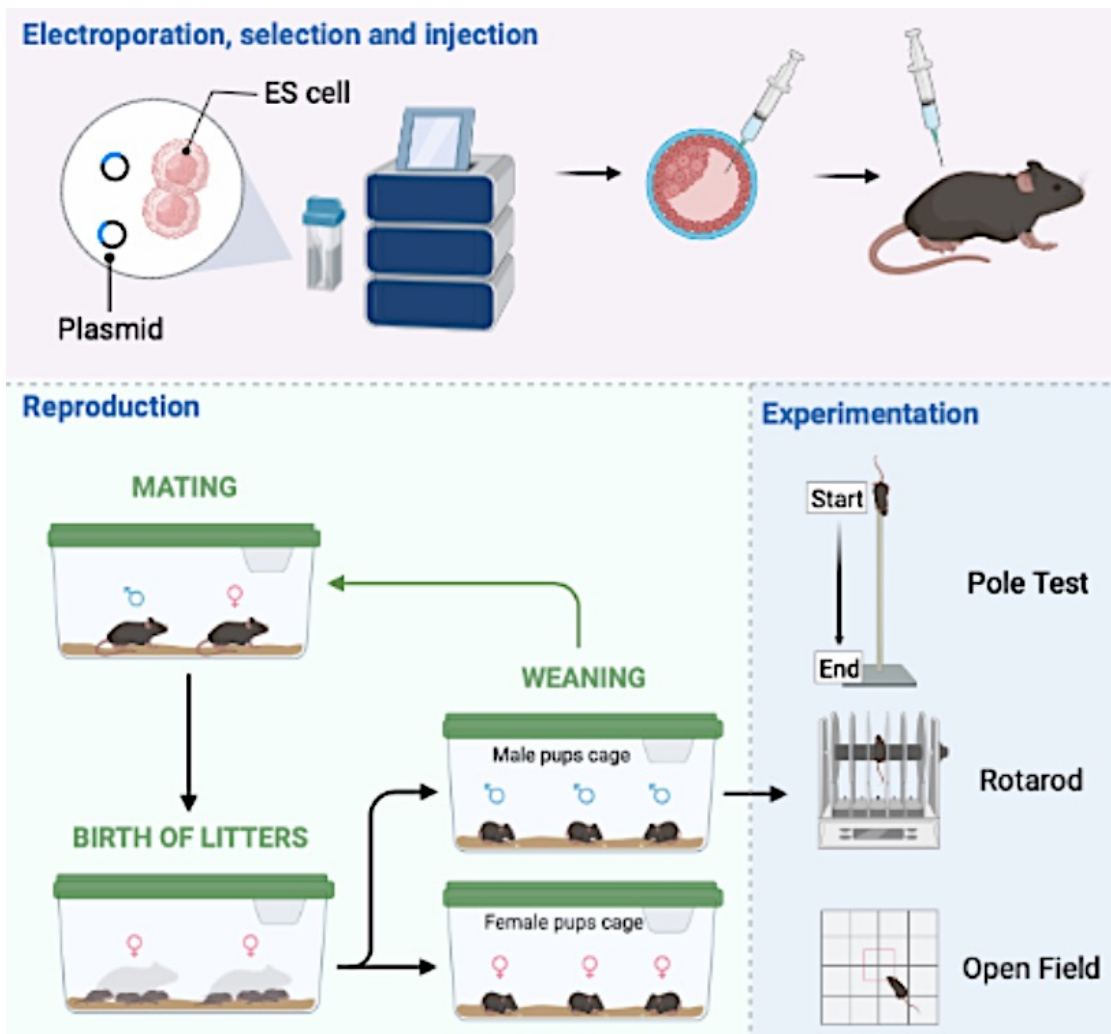

Figure S1. Generation of CHCHD2 p.T61I mutant mice.

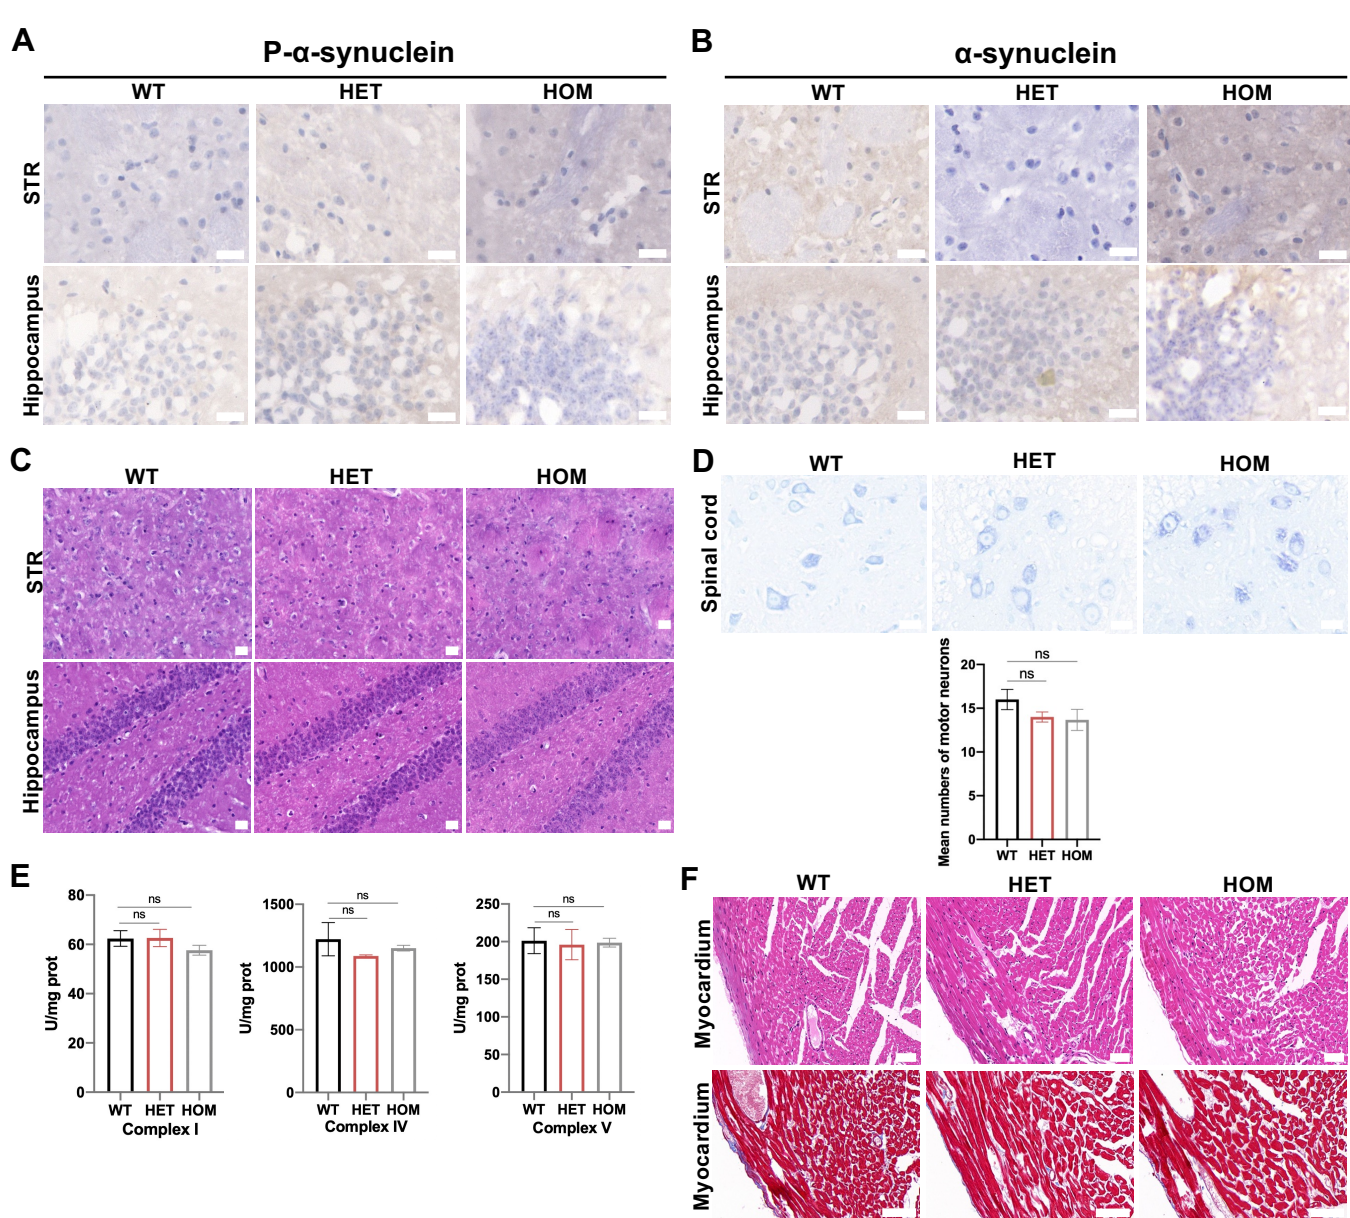

**Figure S2.** Pathological staining of the brain, spinal cords, and myocardium.

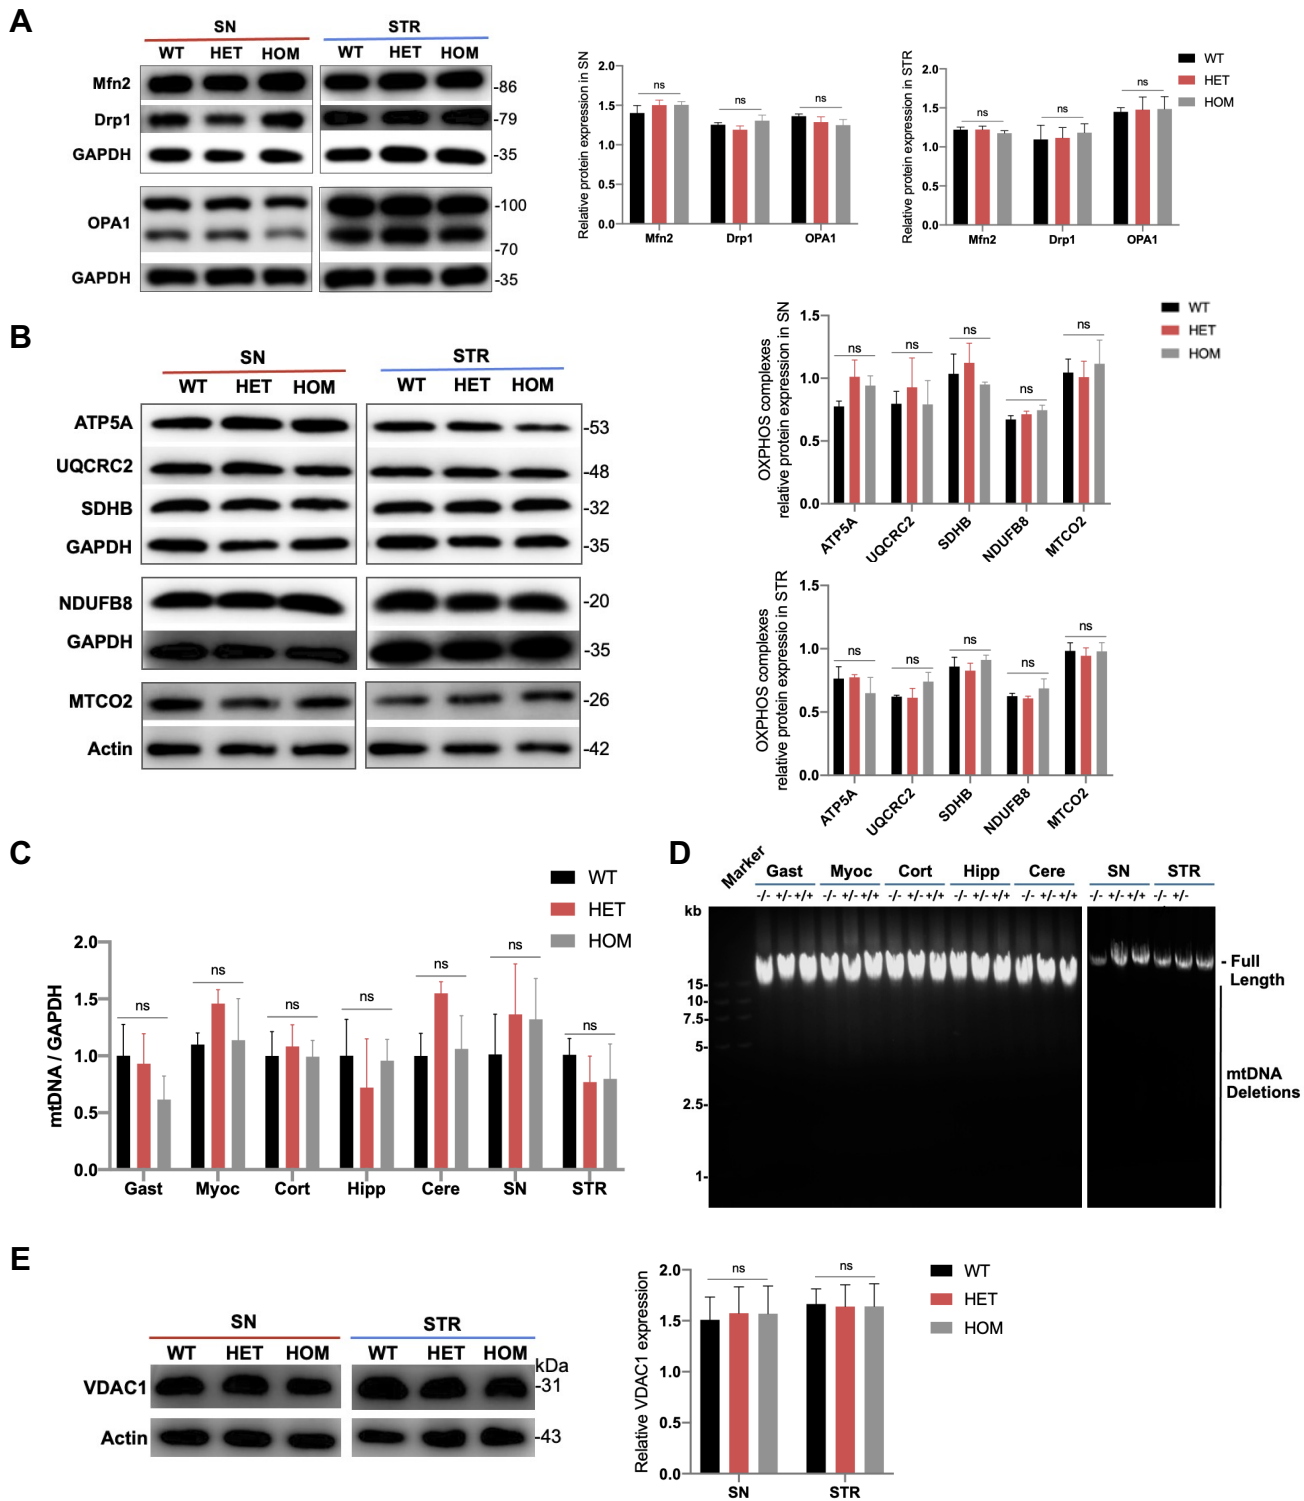

**Figure S3.** Electron transport chain and mtDNA unaffected by CHCHD2 p.T61I mutation.

**A**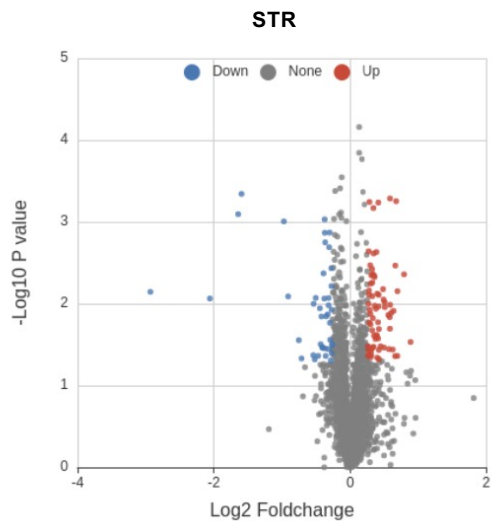**B**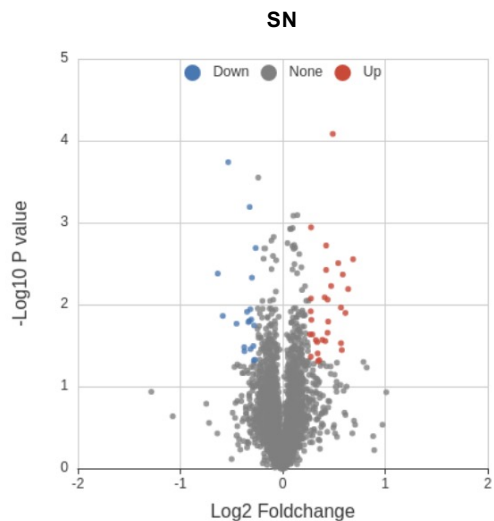**C**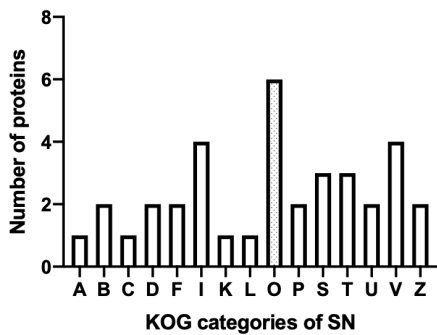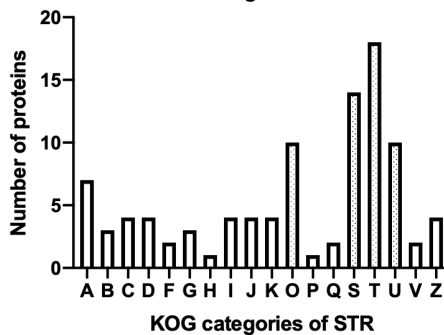

- [A] RNA processing and modification
- [B] Chromatin structure and dynamics
- [C] Energy production and conversion
- [D] Cell cycle control, cell division, chromosome partitioning
- [F] Nucleotide transport and metabolism
- [I] Lipid transport and metabolism
- [G] Carbohydrate transport and metabolism
- [H] Coenzyme transport and metabolism
- [J] Translation, ribosomal structure and biogenesis
- [K] Transcription
- [L] Replication, recombination and repair
- [O] Posttranslational modification, protein turnover, chaperones
- [P] Inorganic ion transport and metabolism
- [Q] Secondary metabolites biosynthesis, transport and catabolism
- [S] Function unknown
- [T] Signal transduction mechanisms
- [U] Intracellular trafficking, secretion, and vesicular transport
- [V] Defense mechanisms
- [Z] Cytoskeleton

**Figure S4.** Proteomics of HET and WT mice.

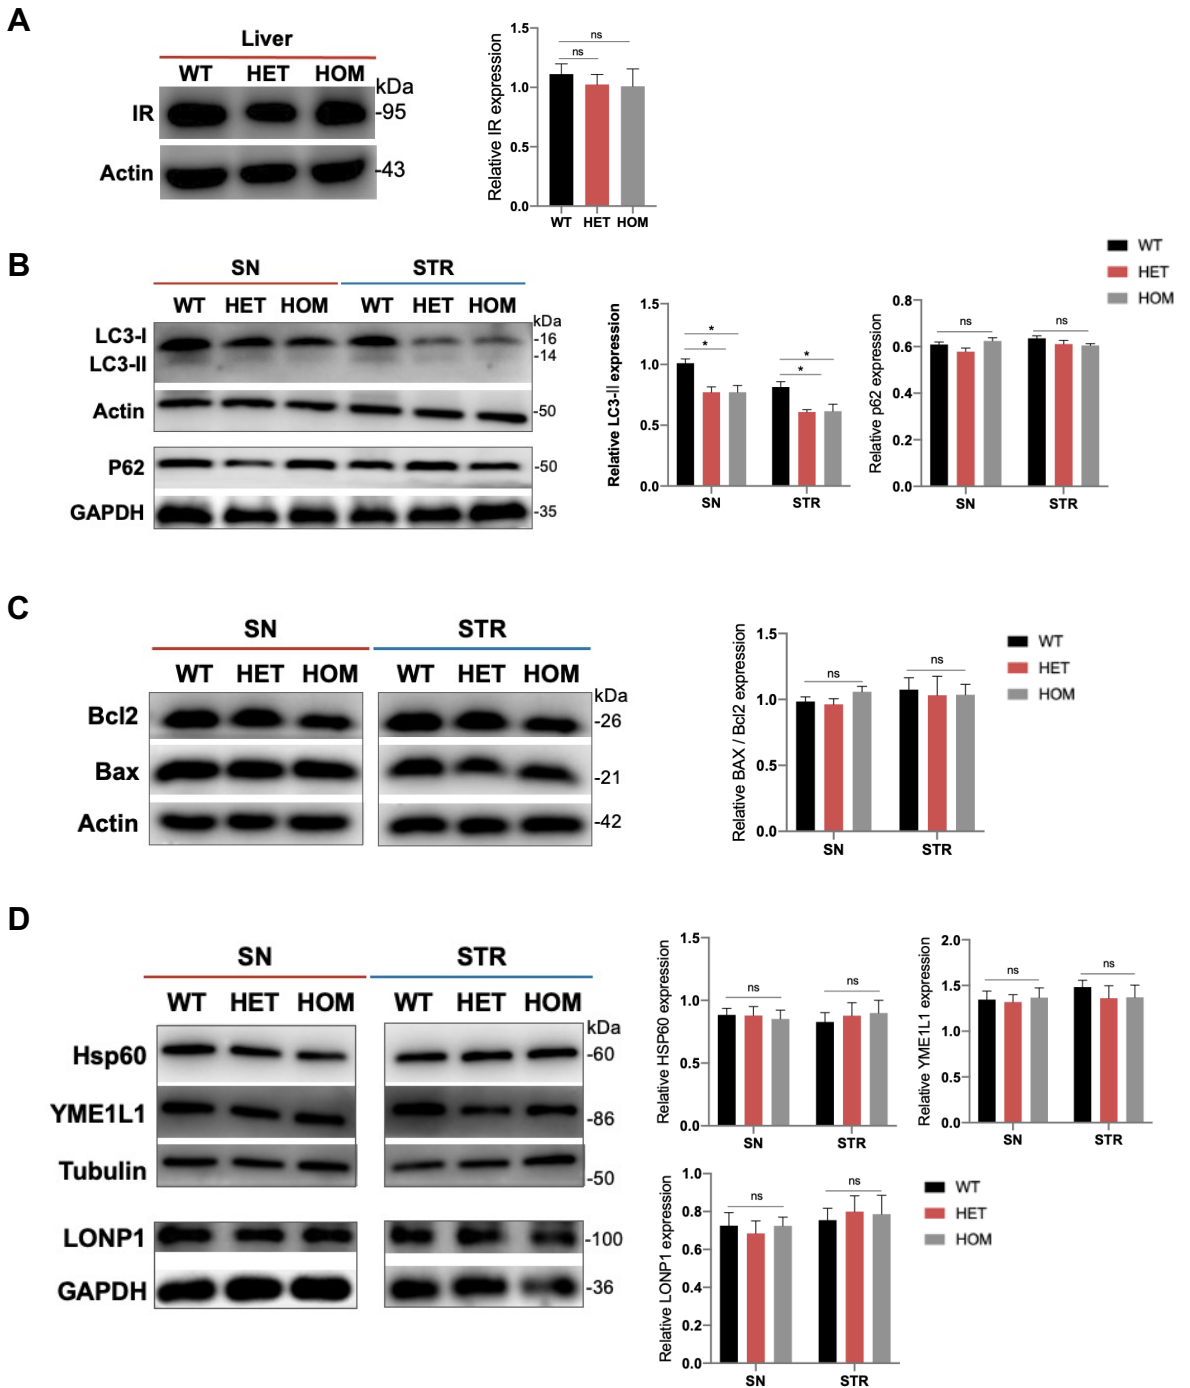

**Figure S5.** Studies on insulin-metabolism, autophagy, apoptosis, and mtUPR pathways.
